# Supplementary material for: Non-Expresser of PR-Genes 1 Positively Regulates Abscisic Acid Signaling in Arabidopsis thaliana
Source: MDPI journal article supplement (doi:10.3390/plants11060815), 2022-03-18
Supplement: s1 [file s1]

Supplementary Materials:

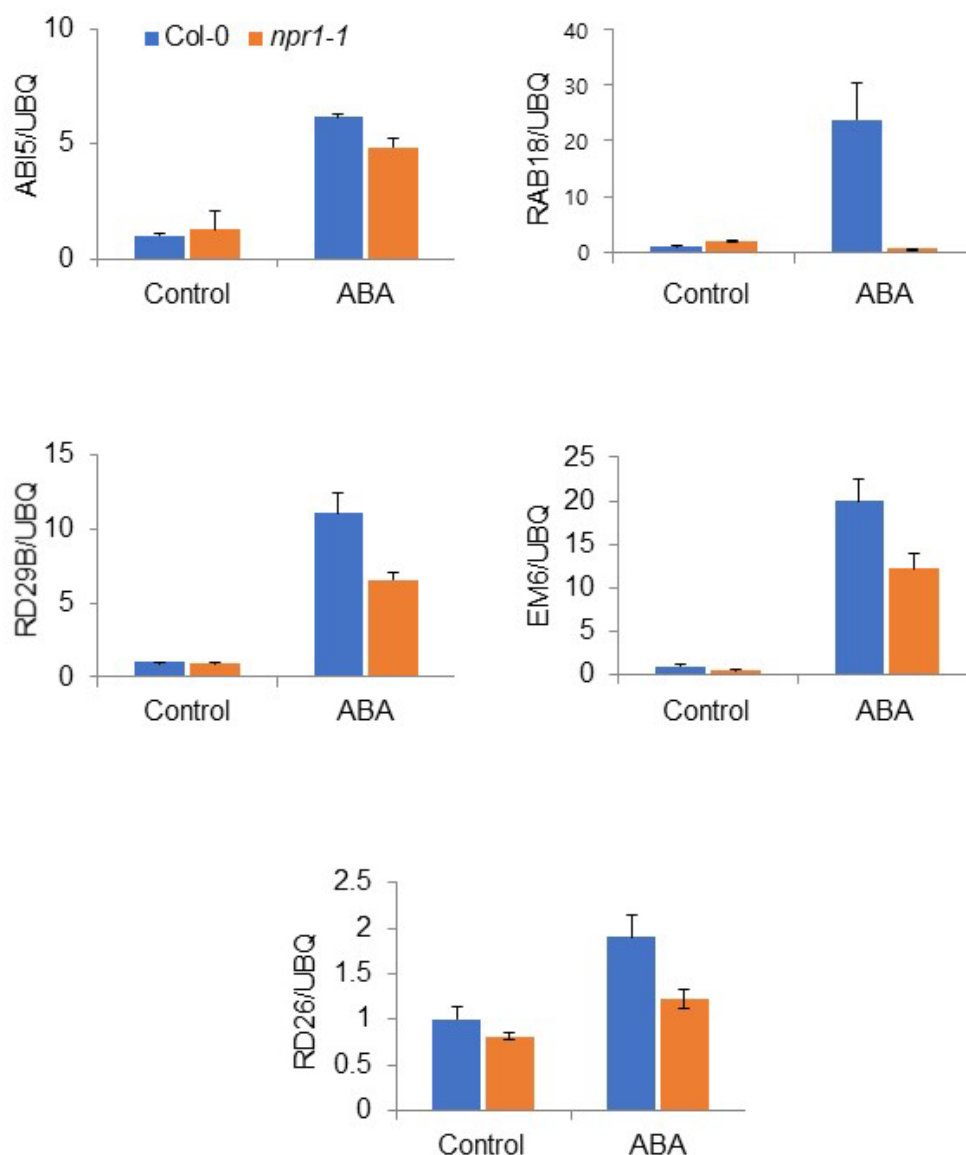

**Figure S1.** Expression analysis of downstream ABA-responsive genes in Col-0 and *npr1-1*. Col-0, *npr1-1*, and 35S::NPR1-GFP/*npr1-1* seeds were directly germinated on  $\frac{1}{2}$  MS (Control) and 0.2  $\mu$ M ABA-containing media (ABA), seedlings were grown for 7 days, total RNA was extracted, and the indicated gene expression was determined by qRT-PCR analysis. *TUB8* was used as an internal control. The error bars indicate  $\pm$  SD. Significant difference was determined by a Student's t-test with a *p*-value of <0.05 (\*) or <0.01 (\*\*).

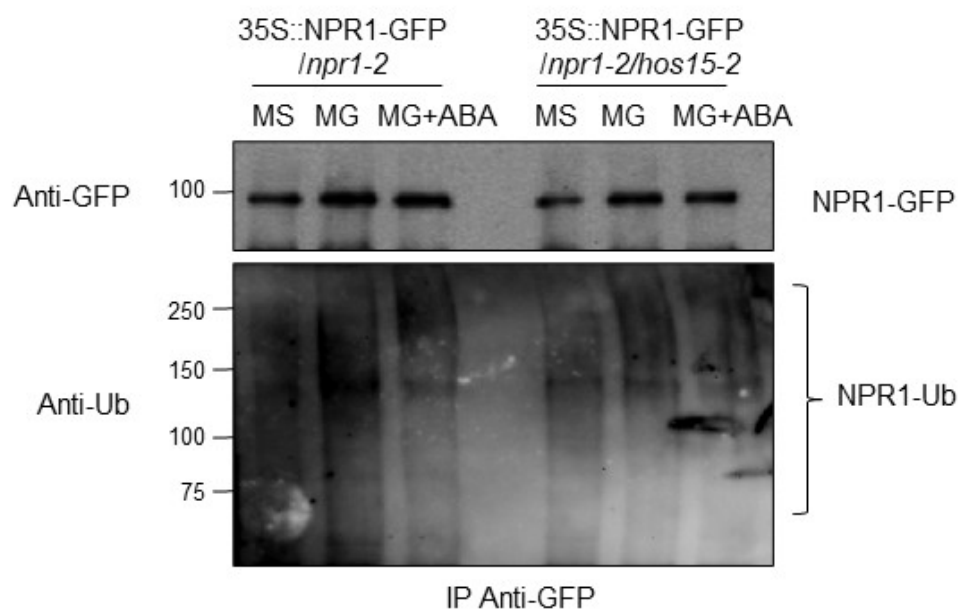

**Figure S2.** HOS15 promotes NPR1 ubiquitination. NPR1 is ubiquitinated in by HOS15. Ten-day-old seedlings of Col-0, 35S::NPR1-GFP/*npr1-2* and 35S::NPR1-GFP/*npr1-2/hos15-2* were treated without (MS) or with MG132 and ABA for 8 h. Total proteins were extracted and immunoprecipitated with anti-GFP antibody. Immuno-precipitated proteins were analyzed using anti-GFP and anti-Ubiquitin antibodies. NPR1 is highly ubiquitinated in WT (Col-0), while ubiquitination of NPR1 was reduced in *hos15-2*.

**Table S1.** List of qRT-PCR primers.

| PRIMERS        | SEQUENCE (5' to 3')                  | PURPOSE              |
|----------------|--------------------------------------|----------------------|
| attB1 adapter  | GGGGACAAGTTTGTACAAAAAAGCAGGCT        | Plasmid construction |
| attB2 adapter  | GGGGACCACTTTGTACAAGAAAGCTGGGT        |                      |
| HOS15 attB1    | AAAAAAGCAGGCTTCATGTCTTCACTTACCTCC    |                      |
| HOS15 attB2    | AGAAAGCTGGGTCCATTCTGAAATCAAGAA       |                      |
| HOS15 no attB2 | AGAAAGCTGGGTGCATTCTGAAATCAAGAACG     |                      |
| NPR1 attB1     | AAAAAAGCAGGCTTCATGGACACCACCATTGATGGA |                      |
| NPR1 attB2     | AGAAAGCTGGGTCTCACCGACGACGATGAGAGAG   |                      |
| ABI4 QRT-F     | GTCCAGATGGGACAATTCCAACACC            | qRT-PCR              |
| ABI4 QRT-R     | CCCTAACGCCACCTCATGATGAAAC            |                      |
| ABI5 QRT-F     | AAGCCACCGGTTTTTAGACACACAG            |                      |
| ABI5 QRT-R     | CACCTCCTCCATTATGTCTCGCTTG            |                      |
| RAB18 QRT-F    | TTCGGTCGTTGTATTGTGCTT T              |                      |
| RAB18 QRT-R    | CCAGATGCTCATTACACACTCATG             |                      |
| RD26 QRT-F     | GAAGGTGAGGCGGAGAGTG                  |                      |
| RD26 QRT-R     | CCCGAAACTCTGAGTCAACCT                |                      |
| RD29B QRT-F    | CTGATCCCACGCATAAAGGT                 |                      |
| RD29B QRT-R    | TCCATCCCAGCTTTTGATTC                 |                      |
| EM6 QRT-F      | GCAAAGAAGGGCGAGACC                   |                      |
| EM6 QRT-R      | TCCTCCTCAGCGTGTTCC                   |                      |
| WRKY18 QRT-F   | CGTGCCTACTGAAACATCGGAC               |                      |
| WRKY18 QRT-R   | GTAAGCTCTAGGTGACGGGTTGTC             |                      |
| WRKY40 QRT-F   | AAATCAGCCCTCCCAAGAAACG               |                      |
| WRKY40 QRT-R   | CTTCACGACAGTCTTCTCTCTCTGC            |                      |
| WRKY60 QRT-F   | GGTGGGCTTGAACCAGTTGAGG               |                      |
| WRKY60 QRT-R   | AATCTCCCGGAAATAGCAGTCG               |                      |
| TUB8 qRT-F     | CGT GGA TCA CAG CAA TAC AGA GCC      |                      |
| TUB8 qRT-R     | CCT CCG CAC TTC CAC TTC GTC TTC      |                      |
